# Supplementary material
Source: PubMed Central journal article supplement (PMC5009472)
Supplement: Supplemental_Table_S1_November_17_2015.pdf [file Supplemental_Table_S1_November_17_2015.pdf]

| <b>Diagnostic criterion</b>                          | <b>PM</b>                      | <b>IBM without chronic features</b> | <b>IBM</b>         |
|------------------------------------------------------|--------------------------------|-------------------------------------|--------------------|
| Lymphocytic endomysial inflammation <sup>&amp;</sup> | Present                        |                                     |                    |
| Inflammatory infiltrate composition <sup>#</sup>     | T-cell rich, B-cell poor       |                                     |                    |
| Degenerating / regenerating fibers <sup>&amp;</sup>  | Present in random distribution |                                     |                    |
| Fiber invasion <sup>#</sup>                          | Present                        |                                     |                    |
| Diffuse MHC-1 positivity <sup>#</sup>                | Present                        |                                     |                    |
| Endomysial fibrosis <sup>&amp;</sup>                 | None or mild                   |                                     | Moderate to severe |
| Fiber size variation <sup>&amp;</sup>                | None or mild                   |                                     | Moderate to severe |
| Rimmed vacuoles <sup>&amp;</sup>                     | Absent                         | Present                             |                    |

**Supplemental Table S1: Summary of diagnostic criteria used for case classification.**

<sup>&</sup> Main criteria (required for diagnosis / classification)

<sup>#</sup> Supporting criteria
